# Supplementary material
Source: publisher figshare collection journal article supplement (https://acs.figshare.com/ndownloader/files/3806716)
Supplement: Supplementary file 1 [file 3806716]

# Supporting Information

## Design and Synthesis of Bubble-Nanorod-Structured Fe<sub>2</sub>O<sub>3</sub>–Carbon Nanofibers as Advanced Anode Material for Li-Ion Batteries

*Jung Sang Cho, Young Jun Hong, and Yun Chan Kang\**

\* Corresponding author: [yckang@korea.ac.kr](mailto:yckang@korea.ac.kr)

### **This file includes:**

- XPS spectra of the (a) - (c) nanofibers post-treated at 500 °C under H<sub>2</sub>/Ar atmosphere and (d) - (f) subsequent heat treated nanofibers at 300 °C under air atmosphere.
- XRD patterns of (a) nanofibers after stabilization process at 220 °C in air atmosphere and (b) subsequent treated nanofibers at 500 °C under H<sub>2</sub>/Ar mixed gas atmosphere.
- (a) TEM and (b) HR-TEM images of Fe<sub>3</sub>C spheres in the structure of FeO<sub>x</sub>–carbon composite nanofibers after heat-treatment at 500 °C under H<sub>2</sub>/Ar gas atmosphere.
- N<sub>2</sub> gas adsorption and desorption isotherms and pore size distributions: (a) and (b) hollow Fe<sub>2</sub>O<sub>3</sub> nanofiber and (c) and (d) bubble-nanorod-structured Fe<sub>2</sub>O<sub>3</sub>-C nanofiber.
- Morphologies of the (a)-(c) bubble–nanorod-structured Fe<sub>2</sub>O<sub>3</sub>–C composite nanofibers and (d)-(f) hollow bare Fe<sub>2</sub>O<sub>3</sub> nanofibers obtained after 300 cycles.
- SEM image of electrospun nanofibers.
- TG analysis of nanofibers post-treated at 500 °C under H<sub>2</sub>/Ar atmosphere.
- FE-SEM image of bubble-rod-structured Fe<sub>2</sub>O<sub>3</sub>-C composite nanofiber.
- Digital photos and SEM images of the nanofibers obtained at a different post-treatment temperatures under air.: (a),(b) 300 °C, (c),(d) 400 °C, (e),(f) 500 °C.

- Electrochemical properties of the bubble-nanorod-structured  $\text{Fe}_2\text{O}_3$ -C composite nanofibers using the anode prepared by mixing the active material, carbon black, and sodium carboxymethyl cellulose (CMC) in a weight ratio of 8:1:1: (a) cycling performance and (b) rate performance.
- Electrochemical properties of  $\text{FeO}_x$ -carbon composite nanofibers after thermal-treatment at 500 °C under  $\text{H}_2/\text{Ar}$  gas atmosphere: (a) cycling performance and (b) charge-discharge curves.

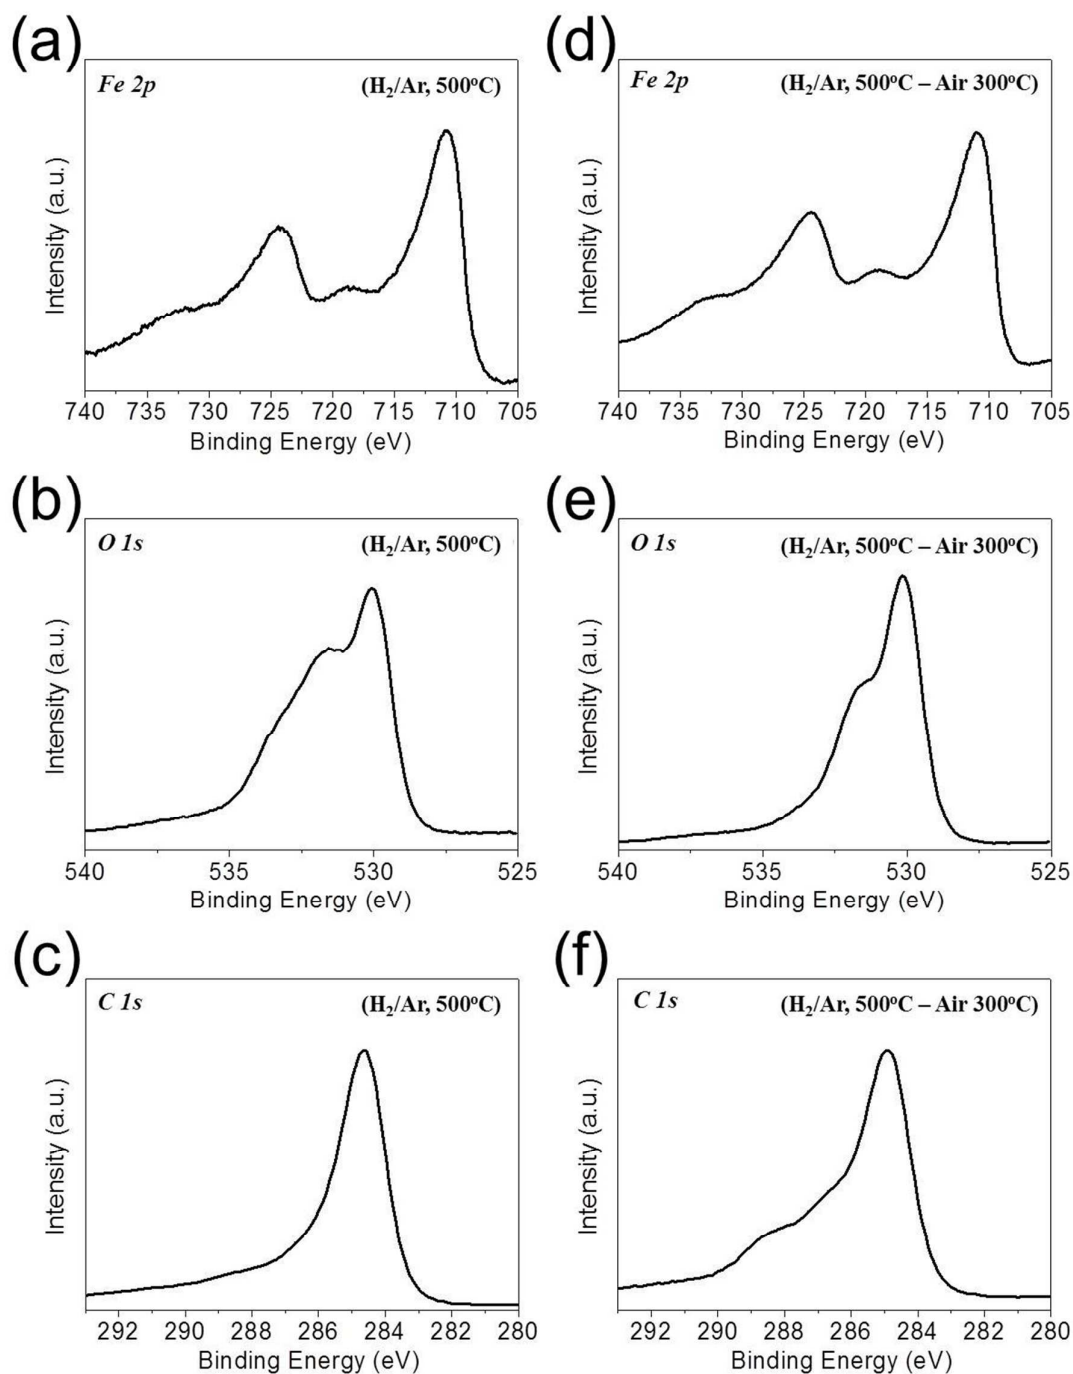

**Figure S1.** XPS spectra of the (a) - (c) nanofibers post-treated at 500 °C under  $\text{H}_2/\text{Ar}$  atmosphere and (d) - (f) subsequent heat treated nanofibers at 300 °C under air atmosphere.

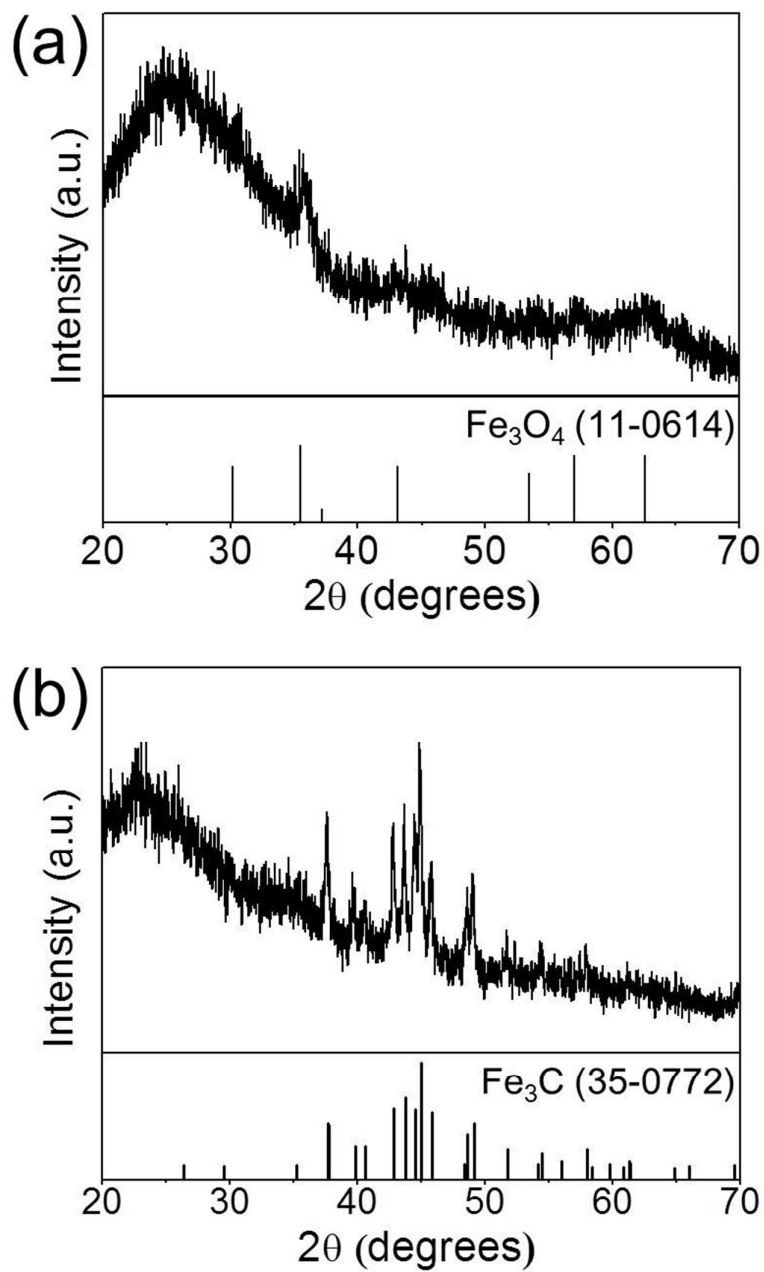

**Figure S2.** XRD patterns of (a) nanofibers after stabilization process at 220 °C in air atmosphere and (b) subsequent treated nanofibers at 500 °C under  $\text{H}_2/\text{Ar}$  mixed gas atmosphere.



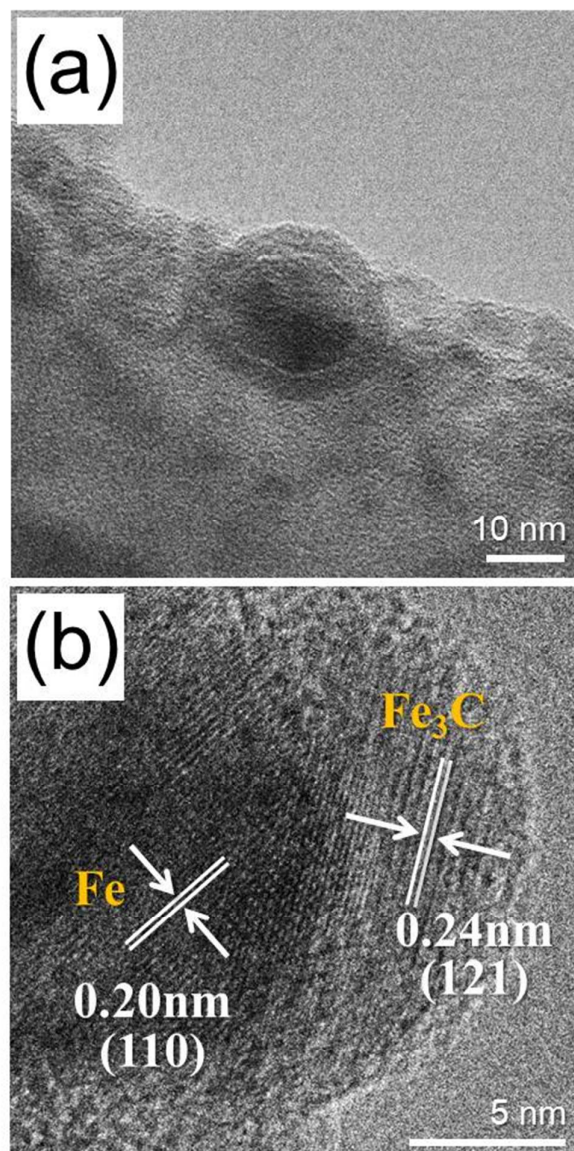

**Figure S3.** (a) TEM and (b) HR-TEM images of Fe<sub>3</sub>C spheres in the structure of FeO<sub>x</sub>-carbon composite nanofibers after heat-treatment at 500 °C under H<sub>2</sub>/Ar gas atmosphere.

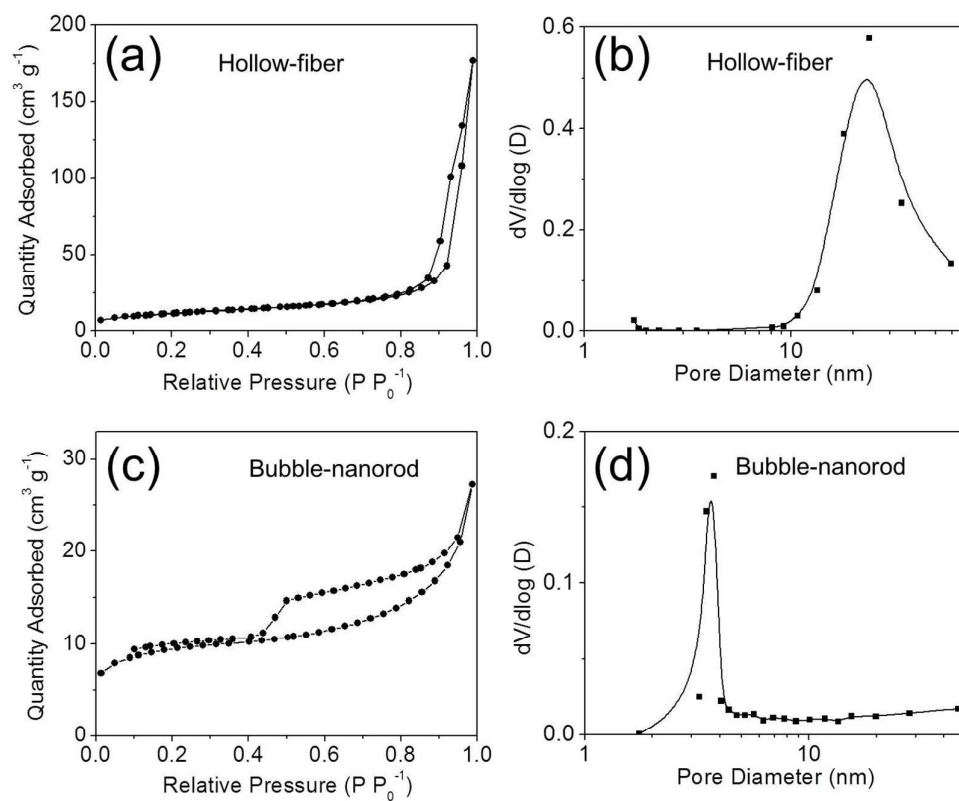

**Figure S4.**  $\text{N}_2$  gas adsorption and desorption isotherms and pore size distributions: (a) and (b) hollow  $\text{Fe}_2\text{O}_3$  nanofiber and (c) and (d) bubble-nanorod-structured  $\text{Fe}_2\text{O}_3\text{-C}$  nanofiber.

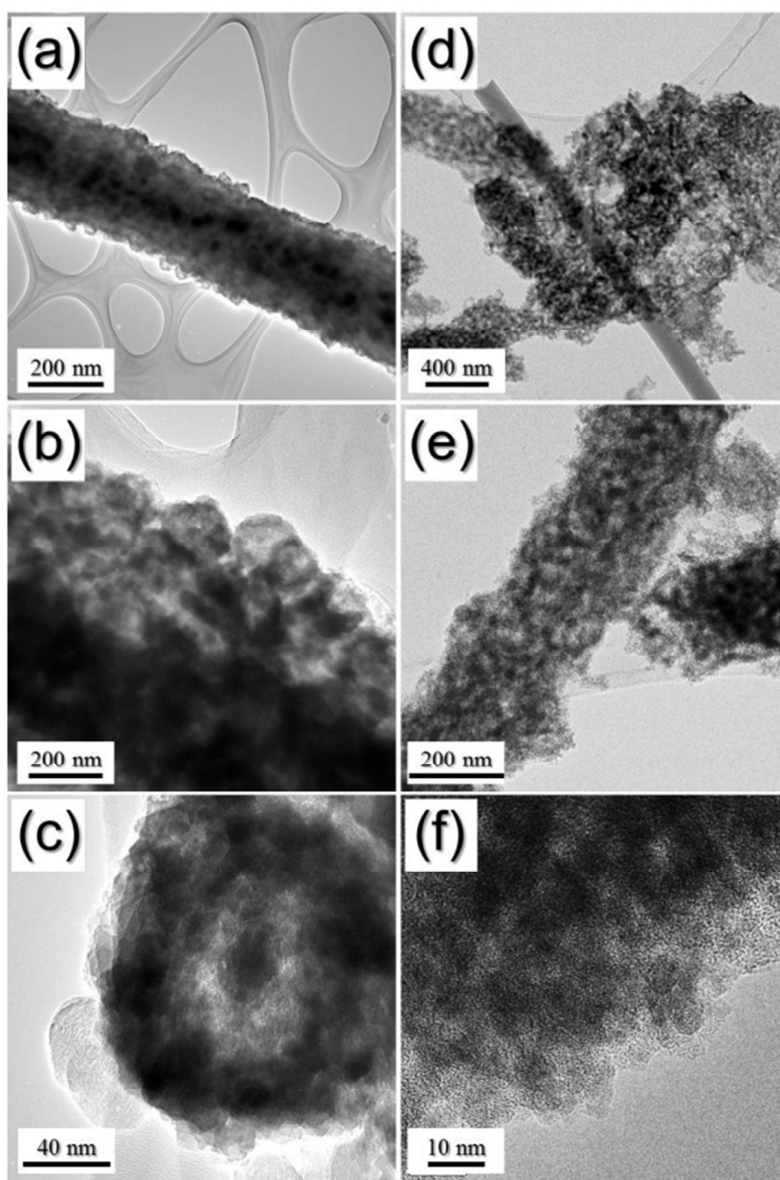

**Figure S5.** Morphologies of the (a)-(c) bubble-nanorod-structured  $\text{Fe}_2\text{O}_3\text{-C}$  composite nanofibers and (d)-(f) hollow bare  $\text{Fe}_2\text{O}_3$  nanofibers obtained after 300 cycles.

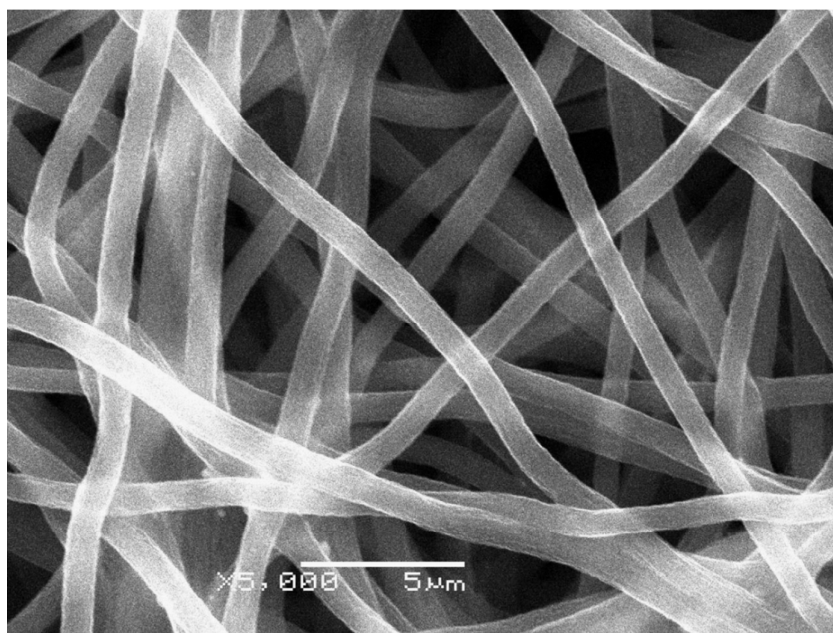

**Figure S6.** SEM image of electrospun nanofibers.

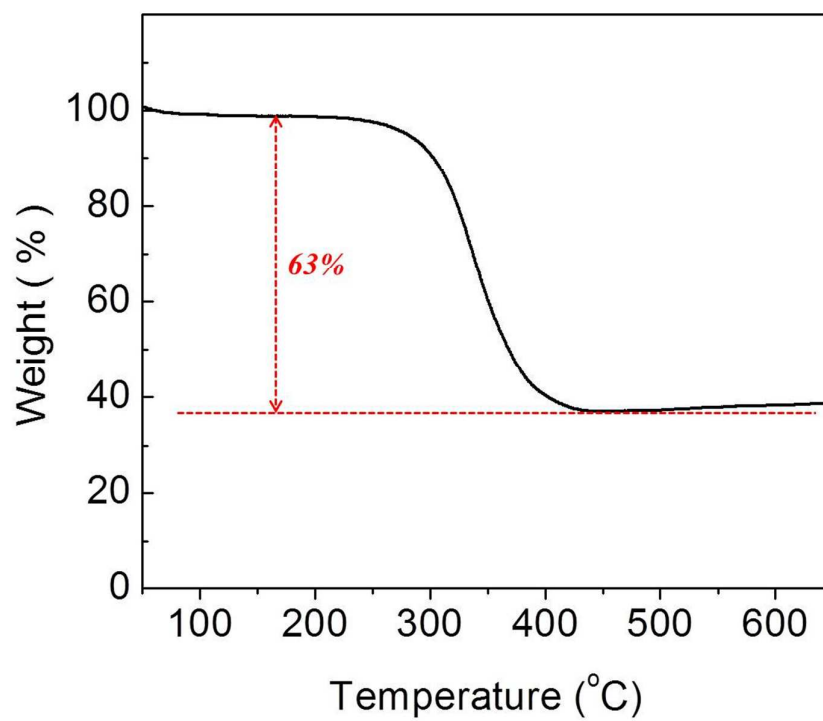

**Figure S7.** TG analysis of the nanofibers post-treated at 500 °C under H<sub>2</sub>/Ar atmosphere.

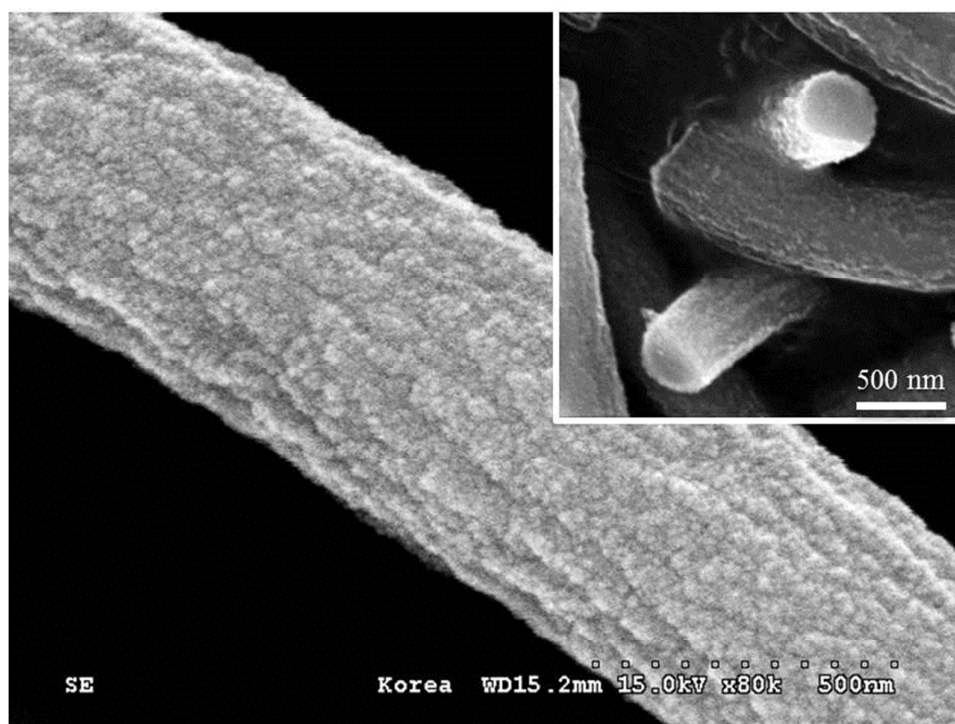

**Figure S8.** FE-SEM image of the bubble-nanorod-structured  $\text{Fe}_2\text{O}_3\text{-C}$  composite nanofiber and cross-section image of the nanofibers (inset image).

The formation mechanism of the hollow bare  $\text{Fe}_2\text{O}_3$  nanofiber was confirmed by investigating the morphological changes of the electrospun nanofiber according to the post-treatment treatment temperatures under air atmosphere. Digital photos and SEM images of the nanofibers obtained at different post-treatment temperatures are shown in **Figure S9**. The nanofibers obtained at a low post-treatment temperature of 300 °C had filled structure and black color. The electrospun nanofibers transformed into the  $\text{FeO}_x\text{-C}$  composite nanofibers at a low post-treatment temperature of 300 °C. However, the nanofibers obtained at post-treatment temperatures of 400 and 500 °C had fiber-in-tube and hollow structures, respectively. The color of the nanofibers obtained at post-treatment temperatures of 400 and 500 °C was red. The complete combustion of carbon material resulted in pure  $\text{Fe}_2\text{O}_3$  nanofibers with red color at post-treatment temperatures of 400 and 500 °C. The  $\text{FeO}_x\text{-C}$  composite nanofiber was formed as an intermediate product during the early stage of the post-treatment process at temperatures of 400 and 500 °C. The complete combustion of  $\text{FeO}_x\text{-C}$  composite nanofiber under air atmosphere produced the fiber-in-tube  $\text{Fe}_2\text{O}_3$  nanofiber. The combustion of the outer layer of the  $\text{FeO}_x\text{-C}$  composite nanofiber produced core-shell-structured  $\text{FeO}_x\text{-C}/\text{Fe}_2\text{O}_3$  nanofiber. Combustion of the  $\text{FeO}_x\text{-C}$  composite did not occur inside the densely structured composite nanofiber because the supply of oxygen as the oxidant to the inside of the nanofiber was insufficient. The contraction of the inner  $\text{FeO}_x\text{-C}$  core part upon further heating produced the  $\text{FeO}_x\text{-C@void@Fe}_2\text{O}_3$  fiber-in-tube nanofiber as an intermediate. The highly crystalline  $\text{Fe}_2\text{O}_3$  shell formed by  $\text{FeO}_x\text{-C}$  combustion had low shrinkage. Finally, the combustion of the  $\text{FeO}_x\text{-C}$  inner fiber produced the  $\text{Fe}_2\text{O}_3\text{@void@Fe}_2\text{O}_3$  fiber-in-tube nanofiber. In this study, the hollow bare  $\text{Fe}_2\text{O}_3$  nanofiber at a high post-treatment temperature of 500 °C was formed by well-known Ostwald ripening mechanism during the heat-treatment process. The Ostwald ripening process transformed the  $\text{Fe}_2\text{O}_3\text{@void@Fe}_2\text{O}_3$  fiber-in-tube nanofiber into the hollow bare  $\text{Fe}_2\text{O}_3$  nanofiber. The Ostwald ripening process induces outward mass migration of small crystallites in the central part of nanofiber during the subsequent heat-treatment procedure, forming hollow structure of the resultant nanofiber.

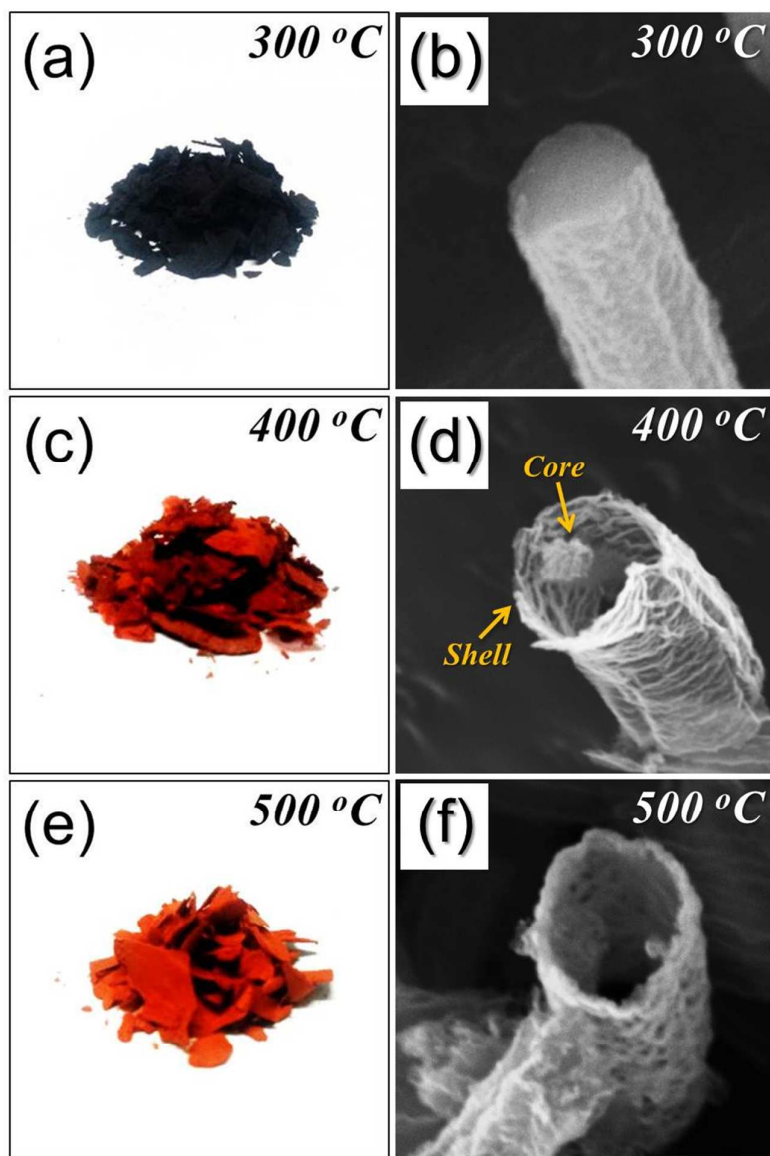

**Figure S9.** Digital photos and SEM images of the nanofibers obtained at different post-treatment temperatures under air: (a) and (b) 300 °C, (c) and (d) 400 °C, (e) and (f) 500 °C.



**Figure S10** shows the electrochemical properties of the electrode with high concentration of active material. The anode was prepared by mixing the active material, carbon black, and sodium carboxymethyl cellulose (CMC) in a weight ratio of 8:1:1. The initial discharge and charge capacities of the bubble–nanorod-structured  $\text{Fe}_2\text{O}_3\text{-C}$  composite nanofibers at a current density of  $1.0 \text{ A g}^{-1}$  were 1365 and 937  $\text{mA h g}^{-1}$ , respectively, and their corresponding initial Coulombic efficiency was 69%. The discharge capacities of the bubble–nanorod-structured  $\text{Fe}_2\text{O}_3\text{-C}$  composite nanofibers for the 2<sup>nd</sup> and 300<sup>th</sup> cycles were 920 and 725  $\text{mA h g}^{-1}$ , respectively.

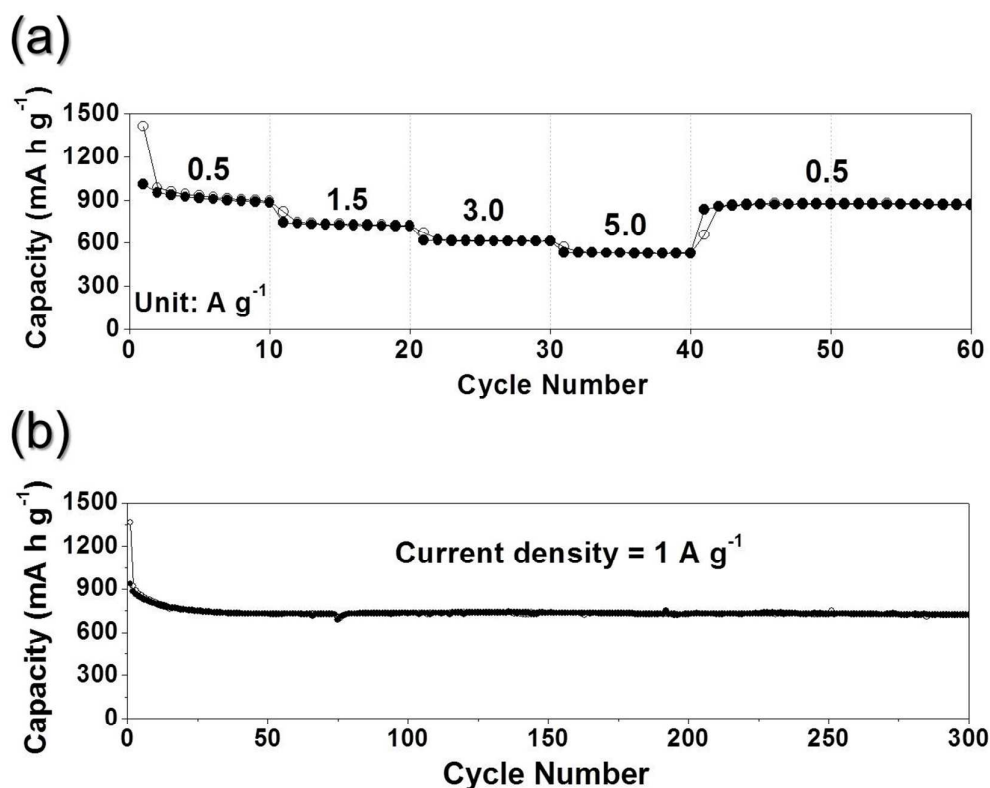

**Figure S10.** Electrochemical properties of the electrode with high concentration of active material: (a) cycling performance and (b) rate performance.

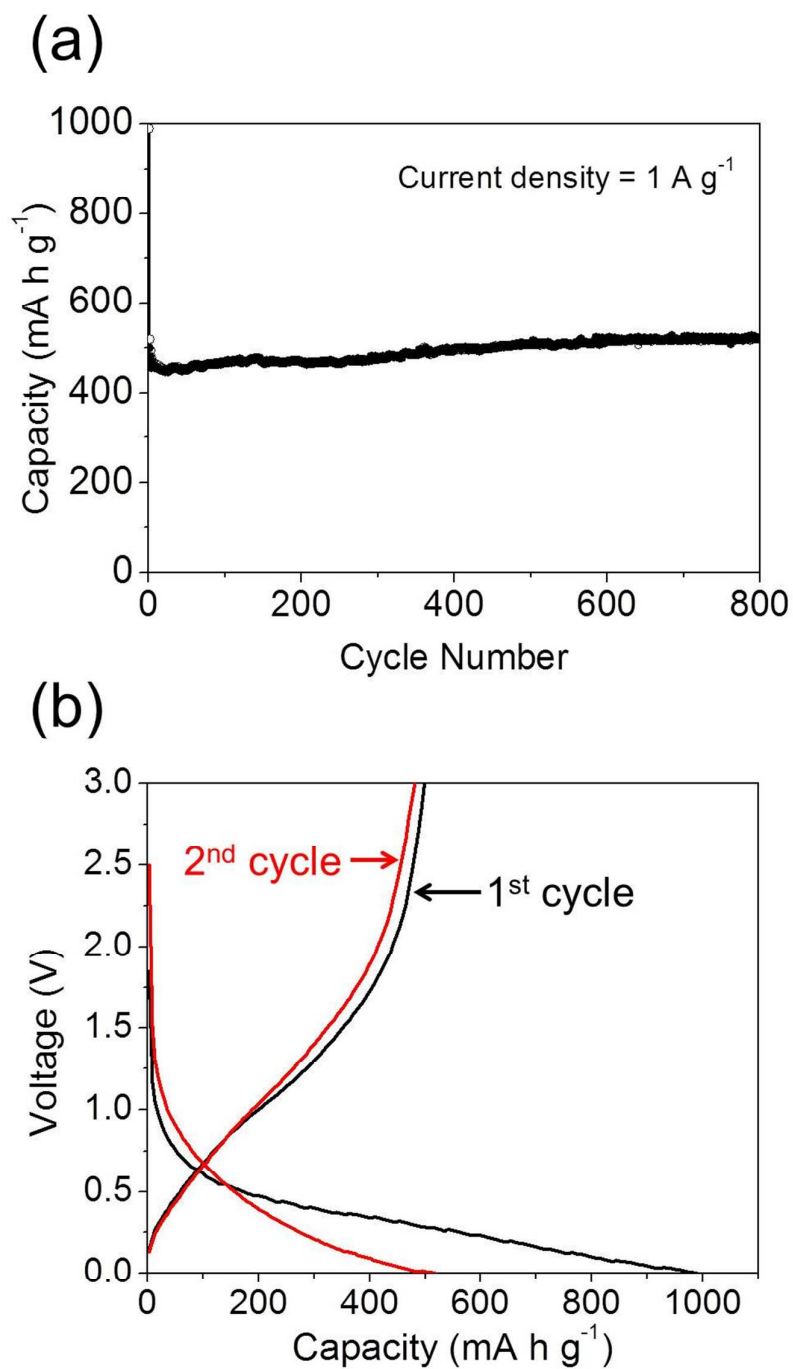

**Figure S11.** Electrochemical properties of  $\text{FeO}_x$ -carbon composite nanofibers after thermal-treatment at  $500^\circ\text{C}$  under  $\text{H}_2/\text{Ar}$  gas atmosphere: (a) cycling performance and (b) charge-discharge curves.
